# Supplementary material for: A prehospital diagnostic algorithm for strokes using machine learning: a prospective observational study
Source: PubMed Central journal article supplement (PMC8521587; doi:10.1038/s41598-021-99828-2), 2021-10-15
Supplement: 41598_2021_99828_MOESM1_ESM.pdf [file 41598_2021_99828_MOESM1_ESM.pdf]

## **Supplemental materials**

### **Supplementary Information**

Expanded Methods

Supplementary Table S1. Collected variables

Supplementary Table S2. Baseline characteristics and clinical outcomes of the test cohort

Supplementary Figure S1. Study flowchart

Supplementary Figure S2. Receiver operating characteristic curve of stroke subcategories and the SHAP value of prehospital large vessel occlusion prediction

Supplementary Methods

### ***Meteorological data***

Daily weather conditions were added as explained features of the model to incorporate the previously reported relationship between stroke and weather<sup>14</sup>. Hourly weather data from the Chiba observational station were obtained from the Japan Meteorological Agency (<https://www.jma.go.jp/jma/indexe.html>). We used hourly ambient temperature, air pressure, and relative humidity data to generate new features such as the thermo-hydrological index (THI). The THI (with units of °C) is given by

$$THI = T_a - 0.55(1 - 0.01RH)(T_a - 14.5),$$

where  $T_a$  is ambient temperature and RH is relative humidity.<sup>22</sup>

Note that we filled 298 missing onset data times with the discovery data times (or with the command data times if the discovery datetime was also not available), in order to merge the prehospital data with the weather data without missing any weather data.

We used 21 meteorological features as primitive candidates for further selection (see Section ***Feature selection***) and listed them below.

|                         |                                                                         |
|-------------------------|-------------------------------------------------------------------------|
| THI_min                 | Minimum THI                                                             |
| THI_max                 | Maximum THI                                                             |
| THI_mean                | Mean THI                                                                |
| THI_ptp                 | THI range                                                               |
| pressure_min            | Minimum air pressure                                                    |
| pressure_max            | Maximum air pressure                                                    |
| pressure_mean           | Mean air pressure                                                       |
| pressure_ptp            | Air pressure range                                                      |
| humidity_min            | Minimum relative humidity                                               |
| humidity_max            | Maximum relative humidity                                               |
| humidity_mean           | Mean relative humidity                                                  |
| THI_diff_days           | Mean THI difference from the previous day                               |
| pressure_diff_days      | Mean air pressure difference from the previous day                      |
| humidity_ptp            | Relative humidity range                                                 |
| humidity_diff_days      | Mean relative humidity difference from the previous day                 |
| THI_5h-1h               | THI difference between at five o'clock and at one o'clock on the date   |
| THI_diff_previous_2days | THI difference from the average two days prior to the onset date        |
| THI_diff_previous_3days | THI difference from the average three days prior to the onset date      |
| THI_diff_previous_4days | THI difference from the average four days prior to the onset date       |
| THI_diff_previous_5days | THI difference from the average five days prior to the onset date       |
| THI_diff_previous_6days | THI difference from the average on the six days prior to the onset date |

### ***Onset time data***

We split the onset time variable into two new features, that is, transformed it to a sine and cosine function to express its periodic nature. Each variable is defined as:

$$hour_{cos} = \cos\left(2\pi \frac{hour_{onset}}{24}\right),$$

$$hour_{sin} = \sin\left(2\pi \frac{hour_{onset}}{24}\right).$$

For example,  $hour_{cos} > 0$  means 0H-12H and  $hour_{sin} < 0$  means 6H-18H.

## References

22. Sueda Y. *et al.* Effects of meteorological conditions on the risk of ischemic stroke events in patients treated with alteplase--hews-tpa. *J Stroke Cerebrovasc Dis.* 24, 1500-1505 (2015).

**Supplementary Table S1. Collected variables**

---

|                                  |                            |
|----------------------------------|----------------------------|
| Age                              | Symptoms                   |
| Sex                              | Headache                   |
| Body mass index                  | Numbness                   |
| Activity of daily life           | Nausea                     |
|                                  | Vomiting                   |
| Past medical history             | Dizziness                  |
| Atrial fibrillation              | Convulsion                 |
| Hypertension                     | Cardiac arrest             |
| Diabetes mellitus                | Arrhythmia                 |
| Intracranial hemorrhage          | Consciousness disturbance  |
| Cerebral infraction              | Miosis                     |
| Epilepsy                         | Mydriasis                  |
| Psychiatric disorder             | Upper limb paralysis       |
| Warfarin, DOAC, and antiplatelet | Lower limb paralysis       |
|                                  | Aphasia                    |
| Vital signs                      | Dysarthria                 |
| Japan coma scale                 | Conjugate deviation        |
| Glasgow coma scale               | Visual field defects       |
| Heart rate                       | Facial palsy               |
| Systolic blood pressure          | Ataxia                     |
| Diastolic blood pressure         | Sensory impairment         |
| Body temperature                 | Unilateral spatial neglect |
| SpO <sub>2</sub>                 |                            |
|                                  | Weather data               |
| Onset timing (hour)              | Thermo-hydrological index  |
| Onset timing (Monday)            | Mean air pressure          |
|                                  | Air pressure difference    |

---

DOAC (direct oral anticoagulant)

**Supplementary Table S2. Baseline characteristics and clinical outcomes of the test cohort**

|                                   | Stroke (n=209)      | Non-stroke (n=81)   | <i>P</i> value |
|-----------------------------------|---------------------|---------------------|----------------|
| Age, years                        | 73.0 (61.0-81.0)    | 74.0 (61.0-82.0)    | .815           |
| Male sex, n (%)                   | 124 (59.3)          | 46 (56.8)           | .794           |
| Past medical history              |                     |                     |                |
| Atrial fibrillation, n (%)        | 16 (7.7)            | 9 (11.1)            | .638           |
| Hypertension, n (%)               | 94 (45.0)           | 30 (37.0)           | .211           |
| Diabetes mellitus, n (%)          | 32 (15.3)           | 13 (16.0)           | .621           |
| Intracranial hemorrhage, n (%)    | 11 (5.3)            | 4 (4.9)             | .642           |
| Cerebral infarction, n (%)        | 48 (23.0)           | 19 (23.5)           | .720           |
| Epilepsy, n (%)                   | 3 (1.4)             | 3 (3.7)             | .389           |
| Psychiatric disorder, n (%)       | 6 (2.9)             | 4 (4.9)             | .686           |
| Anticoagulant, n (%)              | 22 (10.5)           | 9 (11.1)            | .985           |
| Vital signs                       |                     |                     |                |
| Heart rate                        | 80.0 (70.0-96.0)    | 88.0 (70.0-98.0)    | .167           |
| Arrhythmia, n (%)                 | 44 (21.1)           | 11 (13.6)           | .009           |
| Systolic blood pressure           | 173.0 (151.0-196.0) | 170.0 (142.0-187.0) | .109           |
| Diastolic blood pressure          | 95.0 (84.0-110.0)   | 94.0 (80.0-108.0)   | .534           |
| Body temperature                  | 36.4 (36.2-36.8)    | 36.5 (36.2-37.0)    | .074           |
| Japan Coma Scale=0, n (%)         | 86 (41.1)           | 46 (56.8)           | .445           |
| Glasgow Coma Scale                |                     |                     |                |
| Eye opening=4, n (%)              | 143 (68.4)          | 68 (84.0)           | .063           |
| Best verbal response=5, n (%)     | 95 (45.5)           | 49 (60.5)           | .201           |
| Best motor response=6, n (%)      | 151 (72.2)          | 61 (75.3)           | .216           |
| Symptoms                          |                     |                     |                |
| Vomiting, n (%)                   | 31 (14.8)           | 9 (11.1)            | .645           |
| Dizziness, n (%)                  | 15 (7.2)            | 12 (14.8)           | .108           |
| Convulsion, n (%)                 | 2 (1.0)             | 10 (12.3)           | <.001          |
| Upper limbs paralysis, n (%)      | 85 (40.7)           | 30 (37.0)           | .665           |
| Lower limbs paralysis, n (%)      | 100 (47.8)          | 28 (34.6)           | .056           |
| Hemiparalysis, n (%)              | 51 (24.4)           | 5 (6.2)             | .001           |
| Conjugate deviation, n (%)        | 15 (7.2)            | 7 (8.6)             | .889           |
| Visual field defects, n (%)       | 1 (0.5)             | 2 (2.5)             | .283           |
| Facial palsy, n (%)               | 37 (17.7)           | 8 (9.9)             | .204           |
| Ataxia, n (%)                     | 23 (11.0)           | 8 (9.9)             | .824           |
| Sensory impairment, n (%)         | 29 (13.9)           | 4 (4.9)             | .066           |
| Aphasia, n (%)                    | 23 (11.0)           | 8 (9.9)             | .927           |
| Dysarthria, n (%)                 | 69 (33.0)           | 11 (13.6)           | .001           |
| Unilateral spatial neglect, n (%) | 2 (1.0)             | 0 (0.0)             | .627           |
| Onset timing Monday, n (%)        | 27 (12.9)           | 9 (11.1)            | .826           |
| Onset timing (hour)               | 12.0 (8.0-17.0)     | 13.0 (8.0-18.0)     | .523           |
| Minimum THI                       | 13.7 (7.6-18.8)     | 11.7 (7.6-18.3)     | .411           |

THI (thermo-hydrological index)

Data are presented as median and interquartile range for continuous variables.

*P-values* were calculated using Pearson's chi-square test or the Mann-Whitney U test.

**Supplementary Figure S1. Study flowchart**

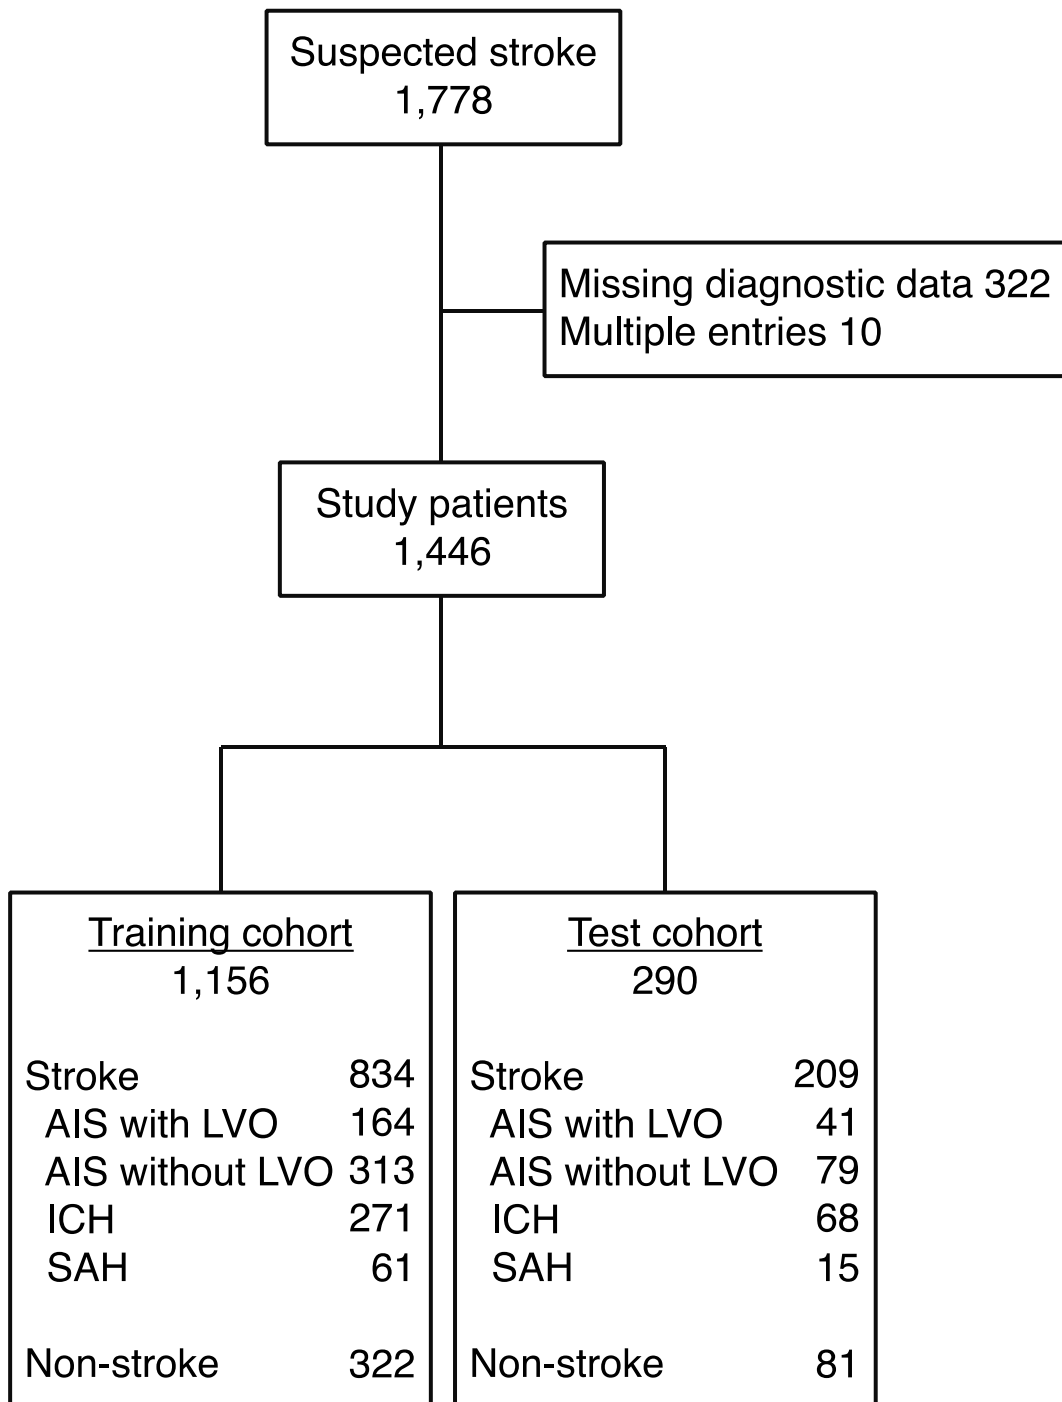

AIS (acute ischemic stroke), LVO (large vessel occlusion), ICH (intracranial hemorrhage), SAH (subarachnoid hemorrhage)

**Supplementary Figure S2. Receiver operating characteristic curve of stroke subcategories and the SHAP value of prehospital large vessel occlusion prediction**

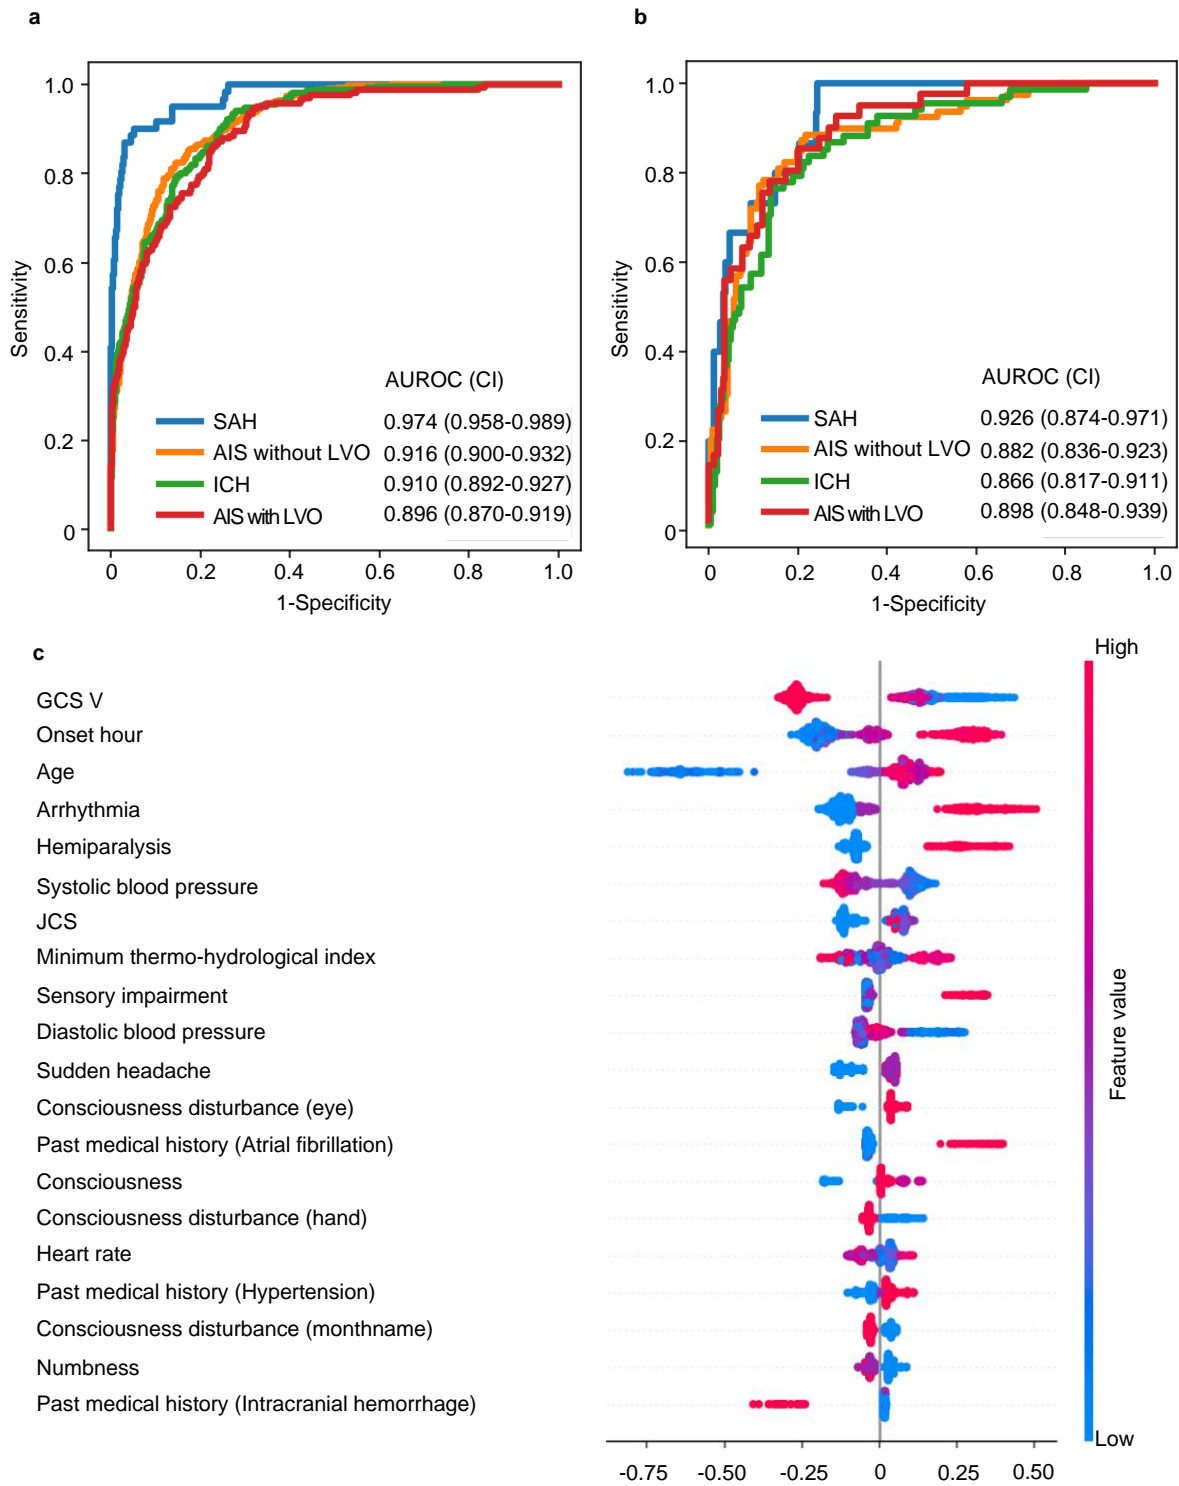

**a. Training cohort. b. Test cohort. c. SHAP value of large vessel occlusion.** SHAP (SHapley Additive exPlanation), Onset hour (  $\cos\left(2\pi\frac{hour_{onset}}{24}\right)$  ), GCS V (Glasgow coma scale, best verbal response), JCS (Japan coma scale)
